# Supplementary material for: Absorption and fluorescence signatures of 1,2,3-triazole based regioisomers: challenging compounds for TD-DFT
Source: Royal Society of Chemistry journal article supplement (doi:10.1039/c4cp00478g), 2014-01-01
Supplement: c4cp00478g2.pdf [file c4cp00478g2.pdf]

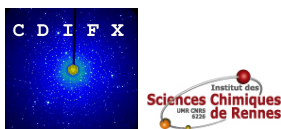

LaTeXreport created by T.R. [CDIFX/ISCR] - Date: 24-10-2013 at 16:55:09  
Working directory: X:\structures\2012\JL.Fillaut\PS143.150K\_27mars12  
Input CIF file : PS143.150K\_27mars12.APEX\_VD\_archive.cif  
CRYSCAL version : Sept. 2013 [T. Roisnel (CDIFX / ISCR UMR6226 - Rennes)]

*PS143: Crystal structure report*

X-ray crystallographic study

( $C_{16} H_{16} N_4$ );  $M = 264.33$ . APEXII, Bruker-AXS diffractometer,  $Mo - K_{\alpha}$  radiation ( $\lambda = 0.71073 \text{ \AA}$ ),  $T = 150(2)K$ ; triclinic  $P\bar{1}$  (I.T.#2),  $a = 5.8977(6)$ ,  $b = 7.4177(7)$ ,  $c = 30.865(3) \text{ \AA}$ ,  $\alpha; = 91.949(4)$ ,  $\beta; = 92.578(5)$ ,  $\gamma; = 94.343(4)^\circ$ ,  $V = 1344.1(2) \text{ \AA}^3$ ,  $Z = 4$ ,  $d = 1.306 \text{ g.cm}^{-3}$ ,  $\mu = 0.081 \text{ mm}^{-1}$ . The structure was solved by direct methods using the SIR97 program [1], and then refined with full-matrix least-square methods based on  $F^2$  (SHELXL-97) [2] with the aid of the WINGX [3] program. All non-hydrogen atoms were refined with anisotropic atomic displacement parameters. H atoms were finally included in their calculated positions. A final refinement on  $F^2$  with 6089 unique intensities and 365 parameters converged at  $\omega R(F^2) = 0.139$  ( $RF = 0.0589$ ) for 4195 observed reflections with ( $I > 2\sigma$ ).

1. A. Altomare, M. C. Burla, M. Camalli, G. Cascarano, C. Giacovazzo, A. Guagliardi, A. G. G. Moliterni, G. Polidori, R. Spagna, J. Appl. Cryst. (1999) 32, 115-119
2. Sheldrick G.M., Acta Cryst. A64 (2008), 112-122
3. L. J. Farrugia, J. Appl. Cryst., 2012, 45, 849-854

## Structural data

|                                   |                                                                                                                              |
|-----------------------------------|------------------------------------------------------------------------------------------------------------------------------|
| Empirical formula                 | $C_{16}H_{16}N_4$                                                                                                            |
| Formula weight                    | 264.33                                                                                                                       |
| Temperature                       | 150(2) K                                                                                                                     |
| Wavelength                        | 0.71073 Å                                                                                                                    |
| Crystal system, space group       | triclinic, $P\bar{1}$                                                                                                        |
| Unit cell dimensions              | a = 5.8977(6) Å, $\alpha$ = 91.949(4) °<br>b = 7.4177(7) Å, $\beta$ = 92.578(5) °<br>c = 30.865(3) Å, $\gamma$ = 94.343(4) ° |
| Volume                            | 1344.1(2) Å <sup>3</sup>                                                                                                     |
| Z, Calculated density             | 4, 1.306 ( $g.cm^{-1}$ )                                                                                                     |
| Absorption coefficient            | 0.081 $mm^{-1}$                                                                                                              |
| F(000)                            | 560                                                                                                                          |
| Crystal size                      | 0.6 x 0.47 x 0.07 mm                                                                                                         |
| Crystal color                     | colourless                                                                                                                   |
| Theta range for data collection   | 3.01 to 27.44 °                                                                                                              |
| h_min, h_max                      | -7, 7                                                                                                                        |
| k_min, k_max                      | -9, 9                                                                                                                        |
| l_min, l_max                      | -39, 39                                                                                                                      |
| Reflections collected / unique    | 16133 / 6089 [ $R_{int}$ ] = 0.0623]                                                                                         |
| Reflections [ $I > 2\sigma$ ]     | 4195                                                                                                                         |
| Completeness to theta_max         | 0.988                                                                                                                        |
| Absorption correction type        | multi-scan                                                                                                                   |
| Max. and min. transmission        | 0.994, 0.726                                                                                                                 |
| Refinement method                 | Full-matrix least-squares on $F^2$                                                                                           |
| Data / restraints / parameters    | 6089 / 0 / 365                                                                                                               |
| <sup>b</sup> Goodness-of-fit      | 1.029                                                                                                                        |
| Final R indices [ $I > 2\sigma$ ] | <sup>c</sup> $R_1$ = 0.0589, <sup>d</sup> $wR_2$ = 0.139                                                                     |
| R indices (all data)              | <sup>c</sup> $R_1$ = 0.0884, <sup>d</sup> $wR_2$ = 0.1541                                                                    |
| Largest diff. peak and hole       | 0.323 and -0.276 $e.\text{Å}^{-3}$                                                                                           |

$${}^a R_{int} = \frac{\sum |F_o^2 - \langle F_o^2 \rangle|}{\sum F_o^2}$$

$${}^b S = \left\{ \frac{\sum [w(F_o^2 - F_c^2)^2]}{n-p} \right\}^{1/2}$$

$${}^c R_1 = \frac{\sum |F_o| - |F_c|}{\sum |F_o|}$$

$${}^d wR_2 = \left\{ \frac{\sum [w(F_o^2 - F_c^2)^2]}{\sum [w(F_o^2)^2]} \right\}^{1/2}$$

$$w = 1. / [\sigma(F_o^2) + (aP)^2 + bP] \text{ with } P = [2F_c^2 + \text{Max}(F_o^2, 0)] / 3$$

Atomic coordinates, site occupancy (%) and equivalent isotropic displacement parameters ( $\text{Å}^2 \times 10^3$ ). U(eq) is defined as one third of the trace of the orthogonalized  $U_{ij}$  tensor.

| Atom | x         | y          | z           | occ. | U(eq)     |
|------|-----------|------------|-------------|------|-----------|
| C1   | 0.7757(3) | 0.1927(3)  | -0.02461(6) | 1    | 0.0303(4) |
| H1   | 0.6284    | 0.1374     | -0.0202     | 1    | 0.036     |
| C2   | 0.8367(3) | 0.2398(3)  | -0.06580(6) | 1    | 0.0355(5) |
| H2   | 0.7296    | 0.2185     | -0.0897     | 1    | 0.043     |
| C3   | 1.0530(4) | 0.3179(3)  | -0.07237(6) | 1    | 0.0366(5) |
| H3   | 1.0938    | 0.3501     | -0.1007     | 1    | 0.044     |
| C4   | 1.2090(3) | 0.3486(3)  | -0.03764(7) | 1    | 0.0349(5) |
| H4   | 1.3576    | 0.4012     | -0.0422     | 1    | 0.042     |
| C5   | 1.1501(3) | 0.3034(3)  | 0.00388(6)  | 1    | 0.0307(4) |
| H5   | 1.2575    | 0.3242     | 0.0277      | 1    | 0.037     |
| C6   | 0.9324(3) | 0.2273(2)  | 0.01006(6)  | 1    | 0.0252(4) |
| N7   | 0.8673(2) | 0.1835(2)  | 0.05287(5)  | 1    | 0.0251(3) |
| N8   | 0.6434(3) | 0.1563(2)  | 0.06108(5)  | 1    | 0.0328(4) |
| N9   | 0.6320(3) | 0.1171(2)  | 0.10239(5)  | 1    | 0.0323(4) |
| C10  | 0.8484(3) | 0.1203(2)  | 0.12086(6)  | 1    | 0.0242(4) |
| C11  | 0.9989(3) | 0.1633(2)  | 0.08935(6)  | 1    | 0.0261(4) |
| H11  | 1.1603    | 0.1761     | 0.0924      | 1    | 0.031     |
| C12  | 0.8916(3) | 0.0793(2)  | 0.16650(6)  | 1    | 0.0237(4) |
| C13  | 0.7232(3) | -0.0065(2) | 0.19056(6)  | 1    | 0.0261(4) |
| H13  | 0.5775    | -0.0393    | 0.177       | 1    | 0.031     |
| C14  | 0.7626(3) | -0.0452(3) | 0.23379(6)  | 1    | 0.0277(4) |
| H14  | 0.6433    | -0.1033    | 0.2491      | 1    | 0.033     |
| C15  | 0.9750(3) | -0.0001(2) | 0.25534(6)  | 1    | 0.0246(4) |
| C16  | 1.1447(3) | 0.0871(3)  | 0.23113(6)  | 1    | 0.0295(4) |
| H16  | 1.2905    | 0.1209     | 0.2446      | 1    | 0.035     |
| C17  | 1.1023(3) | 0.1246(3)  | 0.18795(6)  | 1    | 0.0300(4) |
| H17  | 1.2207    | 0.183      | 0.1725      | 1    | 0.036     |
| N18  | 1.0180(3) | -0.0441(2) | 0.29802(5)  | 1    | 0.0340(4) |
| C19  | 0.8352(3) | -0.1106(3) | 0.32414(6)  | 1    | 0.0367(5) |
| H19A | 0.7401    | -0.0118    | 0.3311      | 1    | 0.055     |
| H19B | 0.8988    | -0.1571    | 0.351       | 1    | 0.055     |
| H19C | 0.7425    | -0.2079    | 0.308       | 1    | 0.055     |
| C20  | 1.2230(3) | 0.0254(3)  | 0.32158(7)  | 1    | 0.0395(5) |
| H20A | 1.3537    | 0.0104     | 0.3036      | 1    | 0.059     |
| H20B | 1.2416    | -0.0408    | 0.3483      | 1    | 0.059     |
| H20C | 1.2139    | 0.1542     | 0.3289      | 1    | 0.059     |
| C21  | 0.3699(3) | 0.2054(2)  | 0.49817(6)  | 1    | 0.0273(4) |
| H21  | 0.2537    | 0.1918     | 0.4757      | 1    | 0.033     |
| C22  | 0.3250(3) | 0.1566(3)  | 0.54023(6)  | 1    | 0.0325(5) |
| H22  | 0.1767    | 0.1089     | 0.5466      | 1    | 0.039     |
| C23  | 0.4950(3) | 0.1769(3)  | 0.57295(6)  | 1    | 0.0341(5) |
| H23  | 0.4634    | 0.1419     | 0.6015      | 1    | 0.041     |
| C24  | 0.7104(3) | 0.2480(3)  | 0.56394(6)  | 1    | 0.0330(5) |
| H24  | 0.8264    | 0.2622     | 0.5864      | 1    | 0.04      |
| C25  | 0.7585(3) | 0.2990(3)  | 0.52215(6)  | 1    | 0.0280(4) |
| H25  | 0.9059    | 0.3497     | 0.516       | 1    | 0.034     |
| C26  | 0.5887(3) | 0.2748(2)  | 0.48971(5)  | 1    | 0.0228(4) |
| N27  | 0.6414(2) | 0.3195(2)  | 0.44619(5)  | 1    | 0.0238(3) |
| N28  | 0.8610(3) | 0.3281(2)  | 0.43454(5)  | 1    | 0.0325(4) |
| N29  | 0.8601(3) | 0.3686(2)  | 0.39333(5)  | 1    | 0.0318(4) |
| C30  | 0.6413(3) | 0.3849(2)  | 0.37823(6)  | 1    | 0.0229(4) |
| C31  | 0.4996(3) | 0.3520(2)  | 0.41204(5)  | 1    | 0.0234(4) |
| H31  | 0.3384    | 0.3521     | 0.4115      | 1    | 0.028     |
| C32  | 0.5837(3) | 0.4313(2)  | 0.33338(5)  | 1    | 0.0228(4) |
| C33  | 0.7279(3) | 0.3943(2)  | 0.30004(6)  | 1    | 0.0246(4) |
| H33  | 0.8661    | 0.341      | 0.3067      | 1    | 0.03      |
| C34  | 0.6731(3) | 0.4339(2)  | 0.25736(6)  | 1    | 0.0252(4) |

|      |           |           |            |   |           |
|------|-----------|-----------|------------|---|-----------|
| H34  | 0.7747    | 0.4073    | 0.2354     | 1 | 0.03      |
| C35  | 0.4706(3) | 0.5124(2) | 0.24598(5) | 1 | 0.0226(4) |
| C36  | 0.3259(3) | 0.5510(2) | 0.27979(6) | 1 | 0.0255(4) |
| H36  | 0.1883    | 0.6058    | 0.2734     | 1 | 0.031     |
| C37  | 0.3826(3) | 0.5099(2) | 0.32220(6) | 1 | 0.0254(4) |
| H37  | 0.2816    | 0.5359    | 0.3443     | 1 | 0.03      |
| N38  | 0.4147(3) | 0.5512(2) | 0.20346(5) | 1 | 0.0306(4) |
| C39  | 0.5673(3) | 0.5147(3) | 0.16927(6) | 1 | 0.0351(5) |
| H39A | 0.71      | 0.5907    | 0.1743     | 1 | 0.053     |
| H39B | 0.496     | 0.5418    | 0.1412     | 1 | 0.053     |
| H39C | 0.5993    | 0.387     | 0.1692     | 1 | 0.053     |
| C40  | 0.1986(3) | 0.6154(3) | 0.19099(6) | 1 | 0.0359(5) |
| H40A | 0.0761    | 0.5294    | 0.1997     | 1 | 0.054     |
| H40B | 0.1876    | 0.627     | 0.1594     | 1 | 0.054     |
| H40C | 0.1846    | 0.7337    | 0.2053     | 1 | 0.054     |

## Anisotropic displacement parameters ( $\text{\AA}^2$ )

The anisotropic displacement factor exponent takes the form:  $-2\pi[h^2a^{*2}U_{11} + \dots + 2hka^*b^*U_{12}]$

| Atom | U11        | U22        | U33        | U23        | U13        | U12        |
|------|------------|------------|------------|------------|------------|------------|
| C1   | 0.0284(10) | 0.0308(11) | 0.0313(10) | 0.0016(8)  | -0.0001(8) | 0.0010(8)  |
| C2   | 0.0380(12) | 0.0389(12) | 0.0296(10) | 0.0009(9)  | -0.0029(9) | 0.0051(9)  |
| C3   | 0.0421(13) | 0.0394(12) | 0.0303(11) | 0.0072(9)  | 0.0069(9)  | 0.0099(9)  |
| C4   | 0.0293(11) | 0.0362(12) | 0.0409(11) | 0.0106(9)  | 0.0070(9)  | 0.0066(9)  |
| C5   | 0.0252(10) | 0.0317(11) | 0.0357(11) | 0.0046(8)  | -0.0016(8) | 0.0044(8)  |
| C6   | 0.0263(10) | 0.0223(10) | 0.0277(9)  | 0.0023(7)  | 0.0017(7)  | 0.0065(7)  |
| N7   | 0.0202(8)  | 0.0265(8)  | 0.0284(8)  | 0.0019(6)  | -0.0009(6) | 0.0021(6)  |
| N8   | 0.0225(9)  | 0.0441(10) | 0.0315(9)  | 0.0020(7)  | 0.0010(7)  | 0.0019(7)  |
| N9   | 0.0251(9)  | 0.0441(10) | 0.0273(8)  | 0.0025(7)  | -0.0018(7) | 0.0014(7)  |
| C10  | 0.0219(9)  | 0.0223(10) | 0.0279(9)  | -0.0025(7) | 0.0002(7)  | 0.0014(7)  |
| C11  | 0.0215(9)  | 0.0259(10) | 0.0307(10) | 0.0025(8)  | -0.0014(7) | 0.0017(7)  |
| C12  | 0.0226(9)  | 0.0216(9)  | 0.0272(9)  | -0.0006(7) | 0.0005(7)  | 0.0037(7)  |
| C13  | 0.0196(9)  | 0.0286(10) | 0.0290(9)  | -0.0023(8) | -0.0020(7) | -0.0028(7) |
| C14  | 0.0218(10) | 0.0294(10) | 0.0313(10) | 0.0036(8)  | 0.0025(7)  | -0.0035(7) |
| C15  | 0.0245(9)  | 0.0199(9)  | 0.0299(9)  | 0.0029(7)  | 0.0002(7)  | 0.0050(7)  |
| C16  | 0.0201(10) | 0.0308(11) | 0.0363(11) | 0.0041(8)  | -0.0055(8) | -0.0034(8) |
| C17  | 0.0214(10) | 0.0321(11) | 0.0361(10) | 0.0084(8)  | 0.0012(8)  | -0.0041(8) |
| N18  | 0.0234(9)  | 0.0468(11) | 0.0313(9)  | 0.0094(8)  | -0.0016(7) | -0.0012(7) |
| C19  | 0.0305(11) | 0.0455(13) | 0.0333(11) | 0.0114(9)  | -0.0024(8) | -0.0050(9) |
| C20  | 0.0332(12) | 0.0464(13) | 0.0369(11) | 0.0124(10) | -0.0099(9) | -0.0079(9) |
| C21  | 0.0249(10) | 0.0302(10) | 0.0275(9)  | 0.0049(8)  | -0.0003(7) | 0.0050(8)  |
| C22  | 0.0292(11) | 0.0354(12) | 0.0351(11) | 0.0106(9)  | 0.0085(8)  | 0.0093(8)  |
| C23  | 0.0405(12) | 0.0414(12) | 0.0229(9)  | 0.0066(8)  | 0.0055(8)  | 0.0141(9)  |
| C24  | 0.0363(12) | 0.0398(12) | 0.0239(10) | 0.0008(8)  | -0.0026(8) | 0.0113(9)  |
| C25  | 0.0259(10) | 0.0296(10) | 0.0286(10) | 0.0023(8)  | -0.0012(8) | 0.0036(8)  |
| C26  | 0.0252(9)  | 0.0226(9)  | 0.0214(9)  | 0.0029(7)  | 0.0004(7)  | 0.0060(7)  |
| N27  | 0.0192(8)  | 0.0275(8)  | 0.0247(8)  | 0.0034(6)  | -0.0011(6) | 0.0012(6)  |
| N28  | 0.0209(8)  | 0.0496(11) | 0.0271(8)  | 0.0071(7)  | -0.0001(6) | 0.0016(7)  |
| N29  | 0.0234(9)  | 0.0453(11) | 0.0266(8)  | 0.0065(7)  | -0.0009(6) | 0.0012(7)  |
| C30  | 0.0199(9)  | 0.0220(9)  | 0.0267(9)  | 0.0025(7)  | -0.0006(7) | 0.0009(7)  |
| C31  | 0.0205(9)  | 0.0245(10) | 0.0251(9)  | 0.0034(7)  | -0.0017(7) | 0.0022(7)  |
| C32  | 0.0210(9)  | 0.0224(9)  | 0.0245(9)  | 0.0038(7)  | -0.0014(7) | -0.0014(7) |
| C33  | 0.0191(9)  | 0.0247(10) | 0.0303(10) | 0.0038(8)  | 0.0003(7)  | 0.0024(7)  |
| C34  | 0.0234(10) | 0.0275(10) | 0.0246(9)  | 0.0009(7)  | 0.0041(7)  | -0.0001(7) |
| C35  | 0.0205(9)  | 0.0229(9)  | 0.0237(9)  | 0.0020(7)  | -0.0014(7) | -0.0028(7) |
| C36  | 0.0199(9)  | 0.0286(10) | 0.0279(9)  | 0.0020(8)  | -0.0009(7) | 0.0028(7)  |
| C37  | 0.0234(9)  | 0.0270(10) | 0.0261(9)  | 0.0004(7)  | 0.0041(7)  | 0.0020(7)  |
| N38  | 0.0215(8)  | 0.0483(11) | 0.0219(8)  | 0.0038(7)  | -0.0010(6) | 0.0023(7)  |
| C39  | 0.0304(11) | 0.0511(14) | 0.0246(10) | 0.0042(9)  | 0.0025(8)  | 0.0058(9)  |
| C40  | 0.0325(11) | 0.0461(13) | 0.0308(10) | 0.0090(9)  | 0.0015(8)  | 0.0105(9)  |

## Bond length [Å]

|     |   |      |   |          |
|-----|---|------|---|----------|
| C1  | - | C2   | = | 1.385(3) |
| C1  | - | C6   | = | 1.386(3) |
| C1  | - | H1   | = | 0.95     |
| C2  | - | C3   | = | 1.387(3) |
| C2  | - | H2   | = | 0.95     |
| C3  | - | C4   | = | 1.382(3) |
| C3  | - | H3   | = | 0.95     |
| C4  | - | C5   | = | 1.388(3) |
| C4  | - | H4   | = | 0.95     |
| C5  | - | C6   | = | 1.386(3) |
| C5  | - | H5   | = | 0.95     |
| C6  | - | N7   | = | 1.433(2) |
| N7  | - | N8   | = | 1.357(2) |
| N7  | - | C11  | = | 1.357(2) |
| N8  | - | N9   | = | 1.321(2) |
| N9  | - | C10  | = | 1.373(2) |
| C10 | - | C11  | = | 1.375(2) |
| C10 | - | C12  | = | 1.466(2) |
| C11 | - | H11  | = | 0.95     |
| C12 | - | C17  | = | 1.394(2) |
| C12 | - | C13  | = | 1.395(2) |
| C13 | - | C14  | = | 1.387(2) |
| C13 | - | H13  | = | 0.95     |
| C14 | - | C15  | = | 1.404(2) |
| C14 | - | H14  | = | 0.95     |
| C15 | - | N18  | = | 1.385(2) |
| C15 | - | C16  | = | 1.407(2) |
| C16 | - | C17  | = | 1.386(2) |
| C16 | - | H16  | = | 0.95     |
| C17 | - | H17  | = | 0.95     |
| N18 | - | C20  | = | 1.435(2) |
| N18 | - | C19  | = | 1.442(2) |
| C19 | - | H19A | = | 0.98     |
| C19 | - | H19B | = | 0.98     |
| C19 | - | H19C | = | 0.98     |
| C20 | - | H20A | = | 0.98     |
| C20 | - | H20B | = | 0.98     |
| C20 | - | H20C | = | 0.98     |
| C21 | - | C22  | = | 1.391(2) |
| C21 | - | C26  | = | 1.392(3) |
| C21 | - | H21  | = | 0.95     |
| C22 | - | C23  | = | 1.387(3) |
| C22 | - | H22  | = | 0.95     |
| C23 | - | C24  | = | 1.382(3) |
| C23 | - | H23  | = | 0.95     |
| C24 | - | C25  | = | 1.392(2) |
| C24 | - | H24  | = | 0.95     |
| C25 | - | C26  | = | 1.381(2) |
| C25 | - | H25  | = | 0.95     |
| C26 | - | N27  | = | 1.436(2) |
| N27 | - | C31  | = | 1.355(2) |
| N27 | - | N28  | = | 1.357(2) |
| N28 | - | N29  | = | 1.317(2) |
| N29 | - | C30  | = | 1.368(2) |
| C30 | - | C31  | = | 1.383(2) |
| C30 | - | C32  | = | 1.469(2) |
| C31 | - | H31  | = | 0.95     |
| C32 | - | C37  | = | 1.396(2) |
| C32 | - | C33  | = | 1.397(2) |
| C33 | - | C34  | = | 1.389(2) |

|     |   |      |   |          |
|-----|---|------|---|----------|
| C33 | - | H33  | = | 0.95     |
| C34 | - | C35  | = | 1.404(2) |
| C34 | - | H34  | = | 0.95     |
| C35 | - | N38  | = | 1.384(2) |
| C35 | - | C36  | = | 1.413(2) |
| C36 | - | C37  | = | 1.386(2) |
| C36 | - | H36  | = | 0.95     |
| C37 | - | H37  | = | 0.95     |
| N38 | - | C40  | = | 1.435(2) |
| N38 | - | C39  | = | 1.449(2) |
| C39 | - | H39A | = | 0.98     |
| C39 | - | H39B | = | 0.98     |
| C39 | - | H39C | = | 0.98     |
| C40 | - | H40A | = | 0.98     |
| C40 | - | H40B | = | 0.98     |
| C40 | - | H40C | = | 0.98     |

## Angles [ ° ]

|      |       |        |              |
|------|-------|--------|--------------|
| C2   | - C1  | - C6   | = 119.18(18) |
| C2   | - C1  | - H1   | = 120.4      |
| C6   | - C1  | - H1   | = 120.4      |
| C1   | - C2  | - C3   | = 120.41(18) |
| C1   | - C2  | - H2   | = 119.8      |
| C3   | - C2  | - H2   | = 119.8      |
| C4   | - C3  | - C2   | = 119.82(18) |
| C4   | - C3  | - H3   | = 120.1      |
| C2   | - C3  | - H3   | = 120.1      |
| C3   | - C4  | - C5   | = 120.46(18) |
| C3   | - C4  | - H4   | = 119.8      |
| C5   | - C4  | - H4   | = 119.8      |
| C6   | - C5  | - C4   | = 119.11(18) |
| C6   | - C5  | - H5   | = 120.4      |
| C4   | - C5  | - H5   | = 120.4      |
| C1   | - C6  | - C5   | = 120.99(17) |
| C1   | - C6  | - N7   | = 119.22(16) |
| C5   | - C6  | - N7   | = 119.80(16) |
| N8   | - N7  | - C11  | = 110.50(14) |
| N8   | - N7  | - C6   | = 119.69(14) |
| C11  | - N7  | - C6   | = 129.80(15) |
| N9   | - N8  | - N7   | = 107.15(14) |
| N8   | - N9  | - C10  | = 109.16(15) |
| N9   | - C10 | - C11  | = 107.93(16) |
| N9   | - C10 | - C12  | = 122.03(16) |
| C11  | - C10 | - C12  | = 130.03(16) |
| N7   | - C11 | - C10  | = 105.26(16) |
| N7   | - C11 | - H11  | = 127.4      |
| C10  | - C11 | - H11  | = 127.4      |
| C17  | - C12 | - C13  | = 116.82(16) |
| C17  | - C12 | - C10  | = 121.70(16) |
| C13  | - C12 | - C10  | = 121.49(16) |
| C14  | - C13 | - C12  | = 121.81(16) |
| C14  | - C13 | - H13  | = 119.1      |
| C12  | - C13 | - H13  | = 119.1      |
| C13  | - C14 | - C15  | = 121.36(16) |
| C13  | - C14 | - H14  | = 119.3      |
| C15  | - C14 | - H14  | = 119.3      |
| N18  | - C15 | - C14  | = 121.65(16) |
| N18  | - C15 | - C16  | = 121.48(16) |
| C14  | - C15 | - C16  | = 116.84(16) |
| C17  | - C16 | - C15  | = 120.99(17) |
| C17  | - C16 | - H16  | = 119.5      |
| C15  | - C16 | - H16  | = 119.5      |
| C16  | - C17 | - C12  | = 122.18(17) |
| C16  | - C17 | - H17  | = 118.9      |
| C12  | - C17 | - H17  | = 118.9      |
| C15  | - N18 | - C20  | = 120.93(15) |
| C15  | - N18 | - C19  | = 120.66(15) |
| C20  | - N18 | - C19  | = 115.62(16) |
| N18  | - C19 | - H19A | = 109.5      |
| N18  | - C19 | - H19B | = 109.5      |
| H19A | - C19 | - H19B | = 109.5      |
| N18  | - C19 | - H19C | = 109.5      |
| H19A | - C19 | - H19C | = 109.5      |
| H19B | - C19 | - H19C | = 109.5      |
| N18  | - C20 | - H20A | = 109.5      |
| N18  | - C20 | - H20B | = 109.5      |
| H20A | - C20 | - H20B | = 109.5      |
| N18  | - C20 | - H20C | = 109.5      |



|      |       |        |              |
|------|-------|--------|--------------|
| H20A | - C20 | - H20C | = 109.5      |
| H20B | - C20 | - H20C | = 109.5      |
| C22  | - C21 | - C26  | = 118.55(17) |
| C22  | - C21 | - H21  | = 120.7      |
| C26  | - C21 | - H21  | = 120.7      |
| C23  | - C22 | - C21  | = 120.57(18) |
| C23  | - C22 | - H22  | = 119.7      |
| C21  | - C22 | - H22  | = 119.7      |
| C24  | - C23 | - C22  | = 119.90(17) |
| C24  | - C23 | - H23  | = 120.1      |
| C22  | - C23 | - H23  | = 120.1      |
| C23  | - C24 | - C25  | = 120.47(18) |
| C23  | - C24 | - H24  | = 119.8      |
| C25  | - C24 | - H24  | = 119.8      |
| C26  | - C25 | - C24  | = 119.01(17) |
| C26  | - C25 | - H25  | = 120.5      |
| C24  | - C25 | - H25  | = 120.5      |
| C25  | - C26 | - C21  | = 121.48(16) |
| C25  | - C26 | - N27  | = 118.96(16) |
| C21  | - C26 | - N27  | = 119.54(15) |
| C31  | - N27 | - N28  | = 110.88(14) |
| C31  | - N27 | - C26  | = 129.49(15) |
| N28  | - N27 | - C26  | = 119.60(14) |
| N29  | - N28 | - N27  | = 106.94(14) |
| N28  | - N29 | - C30  | = 109.50(15) |
| N29  | - C30 | - C31  | = 107.90(15) |
| N29  | - C30 | - C32  | = 122.71(16) |
| C31  | - C30 | - C32  | = 129.39(16) |
| N27  | - C31 | - C30  | = 104.76(15) |
| N27  | - C31 | - H31  | = 127.6      |
| C30  | - C31 | - H31  | = 127.6      |
| C37  | - C32 | - C33  | = 117.50(16) |
| C37  | - C32 | - C30  | = 121.77(16) |
| C33  | - C32 | - C30  | = 120.72(16) |
| C34  | - C33 | - C32  | = 121.30(16) |
| C34  | - C33 | - H33  | = 119.3      |
| C32  | - C33 | - H33  | = 119.3      |
| C33  | - C34 | - C35  | = 121.35(16) |
| C33  | - C34 | - H34  | = 119.3      |
| C35  | - C34 | - H34  | = 119.3      |
| N38  | - C35 | - C34  | = 121.54(16) |
| N38  | - C35 | - C36  | = 121.19(16) |
| C34  | - C35 | - C36  | = 117.27(15) |
| C37  | - C36 | - C35  | = 120.65(17) |
| C37  | - C36 | - H36  | = 119.7      |
| C35  | - C36 | - H36  | = 119.7      |
| C36  | - C37 | - C32  | = 121.93(16) |
| C36  | - C37 | - H37  | = 119        |
| C32  | - C37 | - H37  | = 119        |
| C35  | - N38 | - C40  | = 121.77(15) |
| C35  | - N38 | - C39  | = 120.56(16) |
| C40  | - N38 | - C39  | = 117.51(15) |
| N38  | - C39 | - H39A | = 109.5      |
| N38  | - C39 | - H39B | = 109.5      |
| H39A | - C39 | - H39B | = 109.5      |
| N38  | - C39 | - H39C | = 109.5      |
| H39A | - C39 | - H39C | = 109.5      |
| H39B | - C39 | - H39C | = 109.5      |
| N38  | - C40 | - H40A | = 109.5      |
| N38  | - C40 | - H40B | = 109.5      |
| H40A | - C40 | - H40B | = 109.5      |
| N38  | - C40 | - H40C | = 109.5      |
| H40A | - C40 | - H40C | = 109.5      |

$$H40B - C40 - H40C = 109.5$$

## Torsion angles [°]

|     |       |       |       |               |
|-----|-------|-------|-------|---------------|
| C6  | - C1  | - C2  | - C3  | = 1.0(3)      |
| C1  | - C2  | - C3  | - C4  | = 0.1(3)      |
| C2  | - C3  | - C4  | - C5  | = -0.5(3)     |
| C3  | - C4  | - C5  | - C6  | = -0.2(3)     |
| C2  | - C1  | - C6  | - C5  | = -1.8(3)     |
| C2  | - C1  | - C6  | - N7  | = 178.19(16)  |
| C4  | - C5  | - C6  | - C1  | = 1.3(3)      |
| C4  | - C5  | - C6  | - N7  | = -178.62(16) |
| C1  | - C6  | - N7  | - N8  | = -17.8(3)    |
| C5  | - C6  | - N7  | - N8  | = 162.15(17)  |
| C1  | - C6  | - N7  | - C11 | = 162.39(18)  |
| C5  | - C6  | - N7  | - C11 | = -17.6(3)    |
| C11 | - N7  | - N8  | - N9  | = -0.6(2)     |
| C6  | - N7  | - N8  | - N9  | = 179.54(15)  |
| N7  | - N8  | - N9  | - C10 | = 0.4(2)      |
| N8  | - N9  | - C10 | - C11 | = 0.0(2)      |
| N8  | - N9  | - C10 | - C12 | = -179.02(16) |
| N8  | - N7  | - C11 | - C10 | = 0.6(2)      |
| C6  | - N7  | - C11 | - C10 | = -179.59(17) |
| N9  | - C10 | - C11 | - N7  | = -0.4(2)     |
| C12 | - C10 | - C11 | - N7  | = 178.54(17)  |
| N9  | - C10 | - C12 | - C17 | = -164.02(18) |
| C11 | - C10 | - C12 | - C17 | = 17.2(3)     |
| N9  | - C10 | - C12 | - C13 | = 15.8(3)     |
| C11 | - C10 | - C12 | - C13 | = -162.98(19) |
| C17 | - C12 | - C13 | - C14 | = 0.0(3)      |
| C10 | - C12 | - C13 | - C14 | = -179.79(17) |
| C12 | - C13 | - C14 | - C15 | = -0.2(3)     |
| C13 | - C14 | - C15 | - N18 | = -177.65(17) |
| C13 | - C14 | - C15 | - C16 | = 0.5(3)      |
| N18 | - C15 | - C16 | - C17 | = 177.61(17)  |
| C14 | - C15 | - C16 | - C17 | = -0.6(3)     |
| C15 | - C16 | - C17 | - C12 | = 0.3(3)      |
| C13 | - C12 | - C17 | - C16 | = -0.1(3)     |
| C10 | - C12 | - C17 | - C16 | = 179.74(17)  |
| C14 | - C15 | - N18 | - C20 | = -170.75(19) |
| C16 | - C15 | - N18 | - C20 | = 11.2(3)     |
| C14 | - C15 | - N18 | - C19 | = -10.5(3)    |
| C16 | - C15 | - N18 | - C19 | = 171.42(18)  |
| C26 | - C21 | - C22 | - C23 | = 0.1(3)      |
| C21 | - C22 | - C23 | - C24 | = 0.7(3)      |
| C22 | - C23 | - C24 | - C25 | = -0.2(3)     |
| C23 | - C24 | - C25 | - C26 | = -1.0(3)     |
| C24 | - C25 | - C26 | - C21 | = 1.8(3)      |
| C24 | - C25 | - C26 | - N27 | = -177.09(16) |
| C22 | - C21 | - C26 | - C25 | = -1.3(3)     |
| C22 | - C21 | - C26 | - N27 | = 177.54(16)  |
| C25 | - C26 | - N27 | - C31 | = -161.22(18) |
| C21 | - C26 | - N27 | - C31 | = 19.9(3)     |
| C25 | - C26 | - N27 | - N28 | = 21.0(2)     |
| C21 | - C26 | - N27 | - N28 | = -157.94(17) |
| C31 | - N27 | - N28 | - N29 | = 1.0(2)      |
| C26 | - N27 | - N28 | - N29 | = 179.16(15)  |
| N27 | - N28 | - N29 | - C30 | = -0.4(2)     |
| N28 | - N29 | - C30 | - C31 | = -0.2(2)     |
| N28 | - N29 | - C30 | - C32 | = 179.39(16)  |
| N28 | - N27 | - C31 | - C30 | = -1.06(19)   |
| C26 | - N27 | - C31 | - C30 | = -179.03(16) |
| N29 | - C30 | - C31 | - N27 | = 0.76(19)    |
| C32 | - C30 | - C31 | - N27 | = -178.80(17) |

|     |       |       |       |               |
|-----|-------|-------|-------|---------------|
| N29 | - C30 | - C32 | - C37 | = -156.56(18) |
| C31 | - C30 | - C32 | - C37 | = 22.9(3)     |
| N29 | - C30 | - C32 | - C33 | = 24.8(3)     |
| C31 | - C30 | - C32 | - C33 | = -155.73(18) |
| C37 | - C32 | - C33 | - C34 | = -0.1(3)     |
| C30 | - C32 | - C33 | - C34 | = 178.61(16)  |
| C32 | - C33 | - C34 | - C35 | = -0.1(3)     |
| C33 | - C34 | - C35 | - N38 | = -179.66(16) |
| C33 | - C34 | - C35 | - C36 | = 0.6(3)      |
| N38 | - C35 | - C36 | - C37 | = 179.36(16)  |
| C34 | - C35 | - C36 | - C37 | = -0.9(2)     |
| C35 | - C36 | - C37 | - C32 | = 0.7(3)      |
| C33 | - C32 | - C37 | - C36 | = -0.2(3)     |
| C30 | - C32 | - C37 | - C36 | = -178.91(16) |
| C34 | - C35 | - N38 | - C40 | = 173.99(17)  |
| C36 | - C35 | - N38 | - C40 | = -6.3(3)     |
| C34 | - C35 | - N38 | - C39 | = -1.2(3)     |
| C36 | - C35 | - N38 | - C39 | = 178.55(17)  |

Structure visualisation

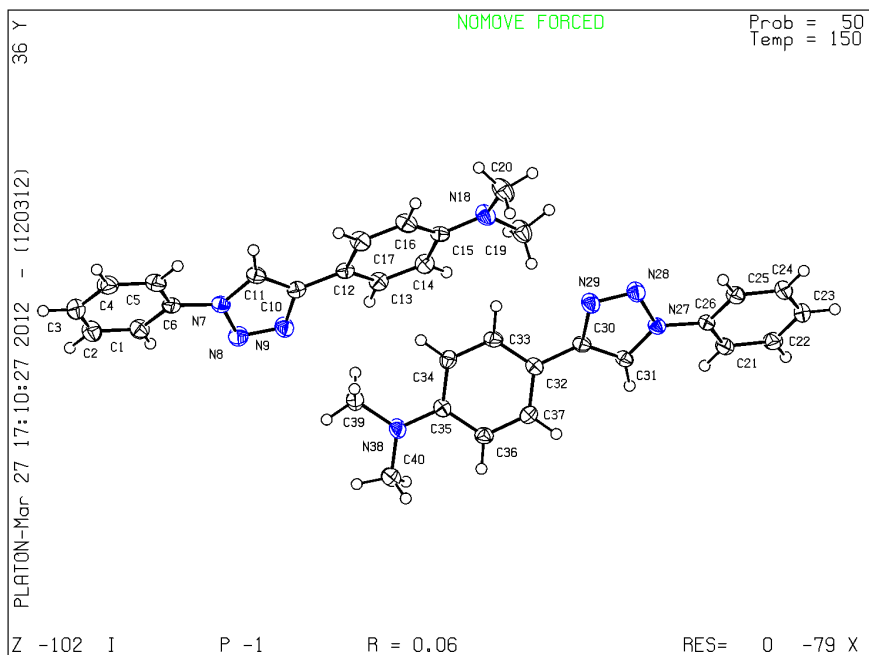

This structural report has been created through CRYSCAL (Sept. 2013). Please report bugs and problems to [cdifx@univ-rennes1.fr](mailto:cdifx@univ-rennes1.fr)
